# Supplementary material
Source: PubMed Central journal article supplement (PMC7006837)
Supplement: NIHMS1048017-supplement-Supp_Info.pdf [file NIHMS1048017-supplement-Supp_Info.pdf]

Supplement of Atmos. Chem. Phys., 17, 11107–11133, 2017  
<https://doi.org/10.5194/acp-17-11107-2017-supplement>  
© Author(s) 2017. This work is distributed under  
the Creative Commons Attribution 3.0 License.

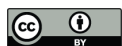

*Supplement of*

## **Semivolatile POA and parameterized total combustion SOA in CMAQv5.2: impacts on source strength and partitioning**

**Benjamin N. Murphy et al.**

*Correspondence to:* Benjamin N. Murphy ([murphy.benjamin@epa.gov](mailto:murphy.benjamin@epa.gov))

The copyright of individual parts of the supplement might differ from the CC BY 3.0 License.

### *SVOC aging mechanism formulation*

The theory of Donahue et al. (2012) was used both to determine the properties of the SVOC compounds used in this study and to populate the SVOC aging mechanism. The volatility of each surrogate species is calculated as a function of its given  $C^*$  and O:C. Specifically, we use the following relationship:

$$\text{Log}_{10}C^* = 0.475 * (25 - n_C) + 2.3 * n_O + 0.6 * n_C * n_O / (n_C + n_O) \quad \text{Eq. S1}$$

where  $C^*$  is the saturation concentration of the surrogate species in  $\mu\text{g m}^{-3}$ ,  $n_C$  is the number of carbon atoms in the species, and  $n_O$  is the number of oxygen atoms in the species (Donahue et al., 2012).

Table S1 shows the stoichiometric coefficients derived from the branching ratio formula (Eq. 1) and the aging kernel published in Donahue et al. (2012). As an example, we provide the oxidation stoichiometry of the oxidation of VSVPO2, one of the surrogates for primary semivolatile vapors:

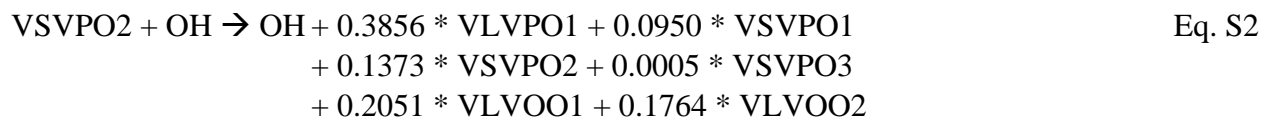

These molar yields are derived in order to conserve carbon. Hydroxyl radicals are assumed to be regenerated by the oxidation reactions so that the aging of POA does not perturb the oxidant budget; the overall reactivity associated with POA mass is small compared to that associated with VOCs. The stoichiometric coefficients indicate that low O:C surrogates (VLVPO1-VIVPO1) in addition to high O:C surrogates (VLVOO1-VSVOO3). This feature ensures that the evolution of bulk O:C behaves similarly to the more detailed approaches. This is described in more detail in the following section.

### *Box model analysis of SVOC aging mechanism*

A box model was constructed to examine differences between the mechanism developed for this study (CMAQ52) and ones used in previous literature. The 2D-VBS formulation for low- $\text{NO}_x$  conditions used by Chuang and Donahue (2016) was chosen for reference (REF). Alternative mechanisms included that of Koo et al. (2014) (KOO), Grieshop et al. (2009) (GRI), and the POA particle-phase aging mechanism found in CMAQv5.1 (Simon and Bhave, 2012) (CMAQ51). The CMAQ51 mechanism included nonvolatile POA but experienced mass growth as the particles age. The box model enforced a constant OH mixing ratio of  $1 \times 10^6 \text{ molec cm}^{-3}$  and particles and vapors equilibrated between every time step (1 min). The initial OA (gas + particle =  $10 \mu\text{g m}^{-3}$ ) was given a volatility distribution equal to that of the primary emissions in CMAQv5.2, hence the semivolatile configurations decrease dramatically in aerosol concentration in the first time step. A background concentration of  $5 \mu\text{g m}^{-3}$  OA was assumed.

The CMAQ52 aging mechanism produced SOA at nearly the same rate as the REF mechanism for the first half hour at this loading and OH concentration (Fig. 1a). After an hour, the CMAQ52

underpredicts by about 10%, whereas the KOO case underpredicts throughout the time series. The GRI case produces SOA at the same rate as the KOO case for the first hour but then continues producing SOA, eventually overtaking the REF case. In general the SOA aging mechanism recovers to about 80% of the original POA mass concentration, and about 55% of the potential POA formed from oxidation. Similar relationships are seen at lower and higher initial concentrations and higher OH concentrations.

Figure 1b shows that the KOO and GRI do a better job predicting O:C of the REF case than does the CMAQ52 mechanism, which overpredicts by about 0.1 in O:C. This is a result of the relatively high O:C chosen for the oxygenated OA species. In the future, the model may treat this SOA production pathway with source-specific model species, allowing the O:C of those species to be more individually tailored to observations of that pollution source.

**Tables S1.** Molar yields specifying the product distribution of the photooxidation of primary organic vapors.

| Reactant | VLVPO1 | VSVPO1 | VSVPO2 | VSVPO3 | VIVPO1 | VLVOO1 | VLVOO2 | VSVOO1 | VSVOO2 | VSVOO3 |
|----------|--------|--------|--------|--------|--------|--------|--------|--------|--------|--------|
| VLVPO1   | 0.486  | 0.006  | 0.003  | 0.003  | 0.002  | 0.294  | 0.202  | 0.0    | 0.002  | 0.002  |
| VSVPO1   | 0.300  | 0.286  | 0.004  | 0.004  | 0.0    | 0.224  | 0.182  | 0.0    | 0.0    | 0.0    |
| VSVPO2   | 0.386  | 0.095  | 0.137  | 0.001  | 0.205  | 0.0    | 0.176  | 0.0    | 0.0    | 0.0    |
| VSVPO3   | 0.218  | 0.306  | 0.015  | 0.104  | 0.0    | 0.189  | 0.167  | 0.0    | 0.0    | 0.0    |
| VIVPO1   | 0.241  | 0.209  | 0.300  | 0.0    | 0.0    | 0.203  | 0.047  | 0.0    | 0.0    | 0.0    |
| VLVOO1   | 0.0    | 0.0    | 0.0    | 0.0    | 0.0    | 0.666  | 0.014  | 0.012  | 0.124  | 0.183  |
| VLVOO2   | 0.0    | 0.0    | 0.0    | 0.0    | 0.0    | 0.286  | 0.393  | 0.014  | 0.103  | 0.205  |
| VSVOO1   | 0.0    | 0.0    | 0.0    | 0.0    | 0.0    | 0.330  | 0.227  | 0.261  | 0.070  | 0.112  |
| VSVOO2   | 0.0    | 0.0    | 0.0    | 0.0    | 0.0    | 0.344  | 0.275  | 0.049  | 0.258  | 0.074  |
| VSVOO3   | 0.0    | 0.0    | 0.0    | 0.0    | 0.0    | 0.389  | 0.242  | 0.064  | 0.039  | 0.267  |

**Tables S2.** Background CO values (ppbV) from observations and CMAQ predictions

| Site        | Observed | Reference             | Predicted |
|-------------|----------|-----------------------|-----------|
| Pasadena    | 110      | Hayes et al. (2013)   | 85        |
| Bakersfield | 90       | Gentner et al. (2012) | 70        |
| Cool        | 85       | Setyan et al. (2012)  | 75        |

\*Predicted background CO is calculated as the average of the bottom 5% of predicted CO concentrations.

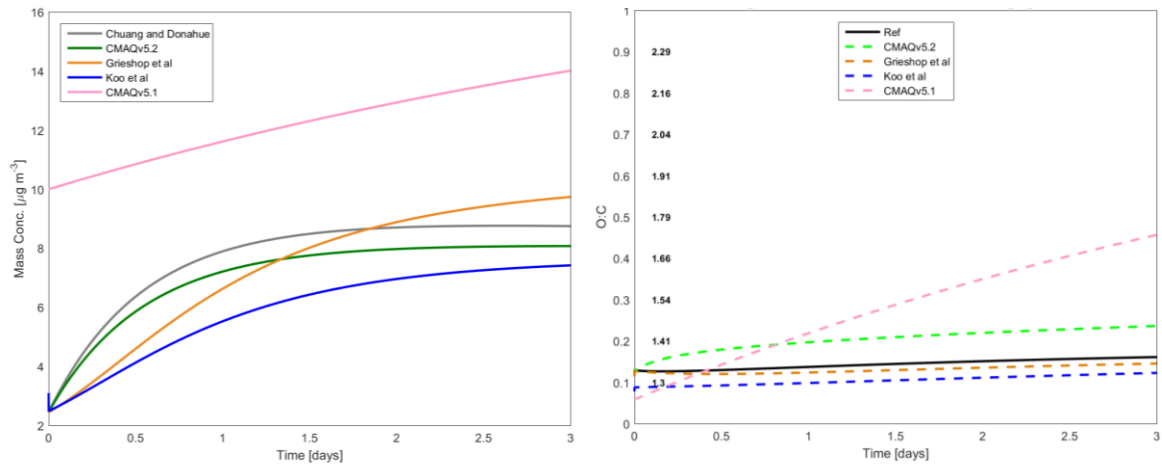

**Figure S1.** Box model OA concentrations (a) and O:C (b) with an assumed constant OH concentration equal to  $1 \times 10^6 \text{ molec cm}^{-3}$ , an initial loading of  $10 \mu\text{g m}^{-3}$  and a background OA concentration of  $5 \mu\text{g m}^{-3}$ . In plot (b) the numbers on the inside of the left axis quantify OM:OC as a function of O:C using the method of Simon and Bhawe (2012).

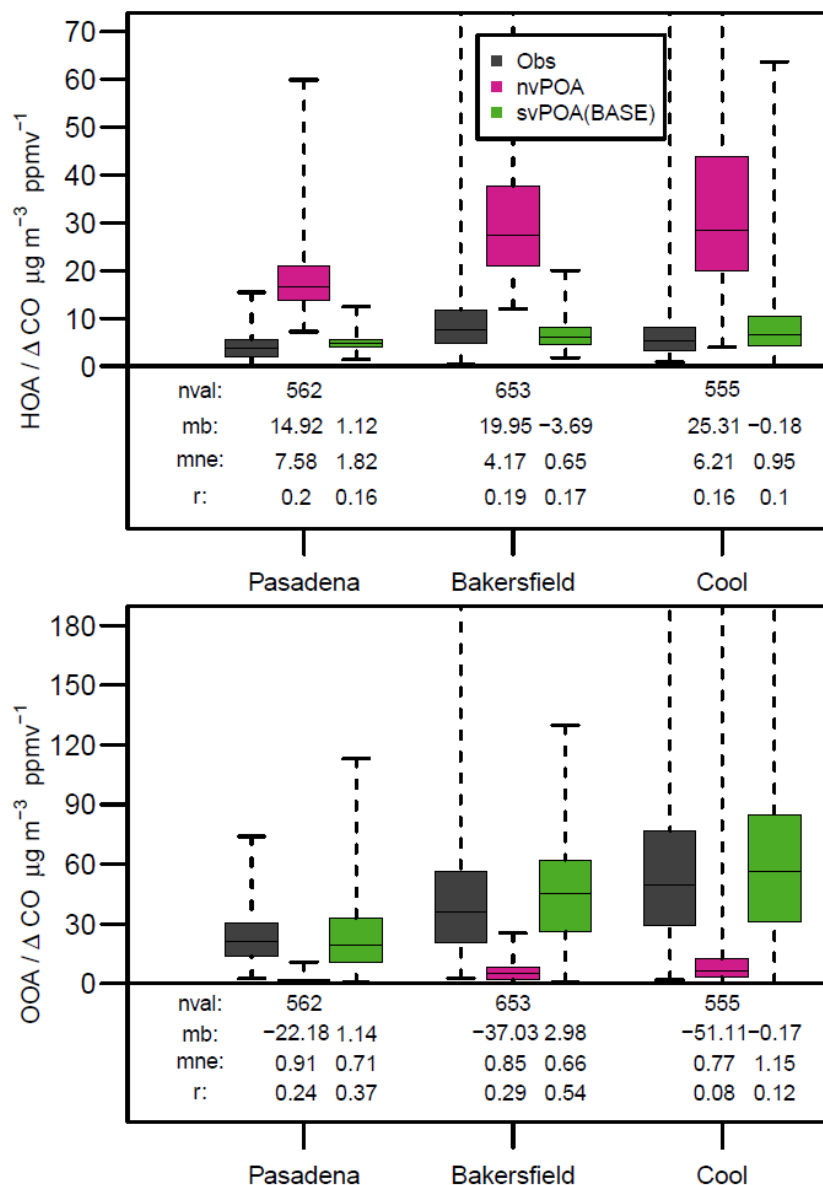

**Figure S2.** Evaluation of CMAQ-predicted hydrocarbon-like and oxygenated organic aerosol at 2 urban sites during CalNex (Pasadena and Bakersfield) and one urban downwind site during CARES (Cool). HOA and OOA from CMAQ are approximated by summing primary and secondary organic aerosol species, respectively, consistent with table 4. Here, all observed and predicted OA concentrations are normalized by the corresponding observed or predicted CO enhancement. The site-dependent background CO values applied to the observations are informed by existing literature while those applied to the CMAQ-predicted CO are calculated as the mean of the bottom 5% of the timeseries at each site. The background values are reported in table S2.

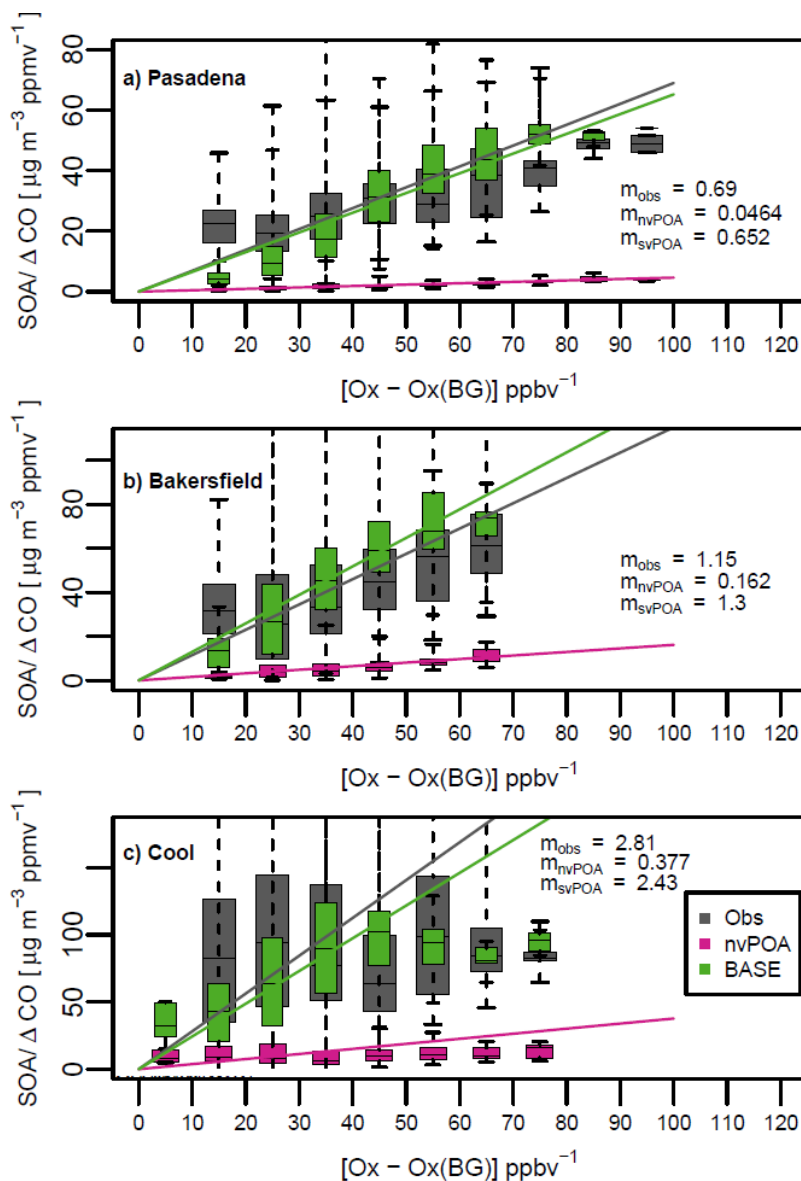

**Figure S3.** OOA observed and predicted enhancement as a function of oxidant loading at two urban sites during CalNex (Pasadena and Bakersfield) and one urban downwind sites during CARES (Cool). Ox concentrations are calculated as the sum of  $\text{O}_3$  and  $\text{NO}_2$  for Pasadena and Bakersfield. For Cool, the observed  $\text{NO}_2$  concentrations are approximated as the difference between  $\text{NO}_y$  and  $\text{NO}$ . Here the OOA (observed) and SOA (predicted) concentrations are normalized by the CO enhancement ( $\Delta\text{CO}$ ) consistent with Fig. S2.



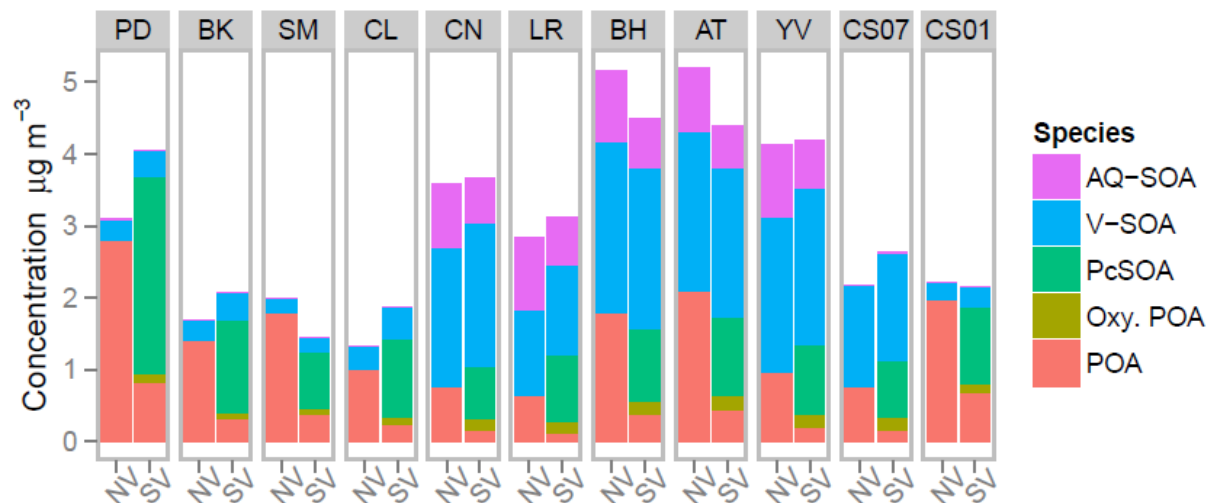

**Figure S4.** Composition of organic aerosol predicted by CMAQv5.2 run for both nonvolatile POA (NV) and semivolatile POA with pcSOA (SV). The species depicted include POA with very low O:C (POA), POA with high O:C (oxygenated POA or Oxy. POA), potential combustion SOA (pcSOA), SOA from traditional anthropogenic and biogenic VOCs (V-SOA), and SOA formed in the aqueous aerosol and cloud water phases (AQ-SOA). The sites shown in this figure include Pasadena (PD), Bakersfield (BK), Sacramento (SM), Cool (CL), Centreville (CN), Look Rock (LR), Birmingham (BH), Atlanta (AT), and Yorkville (YK). The rightmost two comparisons show the average contributions to OA for grid cells in the continental US from the CONUS11 simulation during July (CS07) and January (CS01). The higher contribution of AQ-SOA at the sites in the southeast US is a result of that simulation including isoprene and terpene aqueous-phase formation pathways that are not present in the California and CONUS-scale simulations.

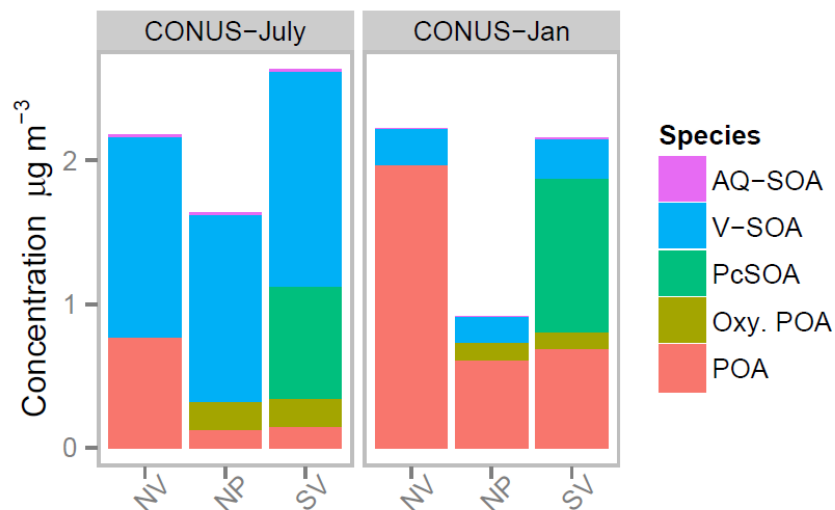

**Figure S5.** Composition of organic aerosol predicted by CMAQv5.2 run for both nonvolatile POA (NV), semivolatile POA with no pcSOA (NP), and semivolatile POA with pcSOA (SV). The species depicted include POA with very low O:C (POA), POA with high O:C (oxygenated POA or Oxy. POA), potential combustion SOA (pcSOA), SOA from traditional anthropogenic and biogenic VOCs (V-SOA), and SOA formed in the aqueous aerosol and cloud water phases (AQ-SOA). The concentrations are average contributions to OA for grid cells in the continental US from the CONUS11 simulation during July (CONUS-July) and January (CONUS-Jan).

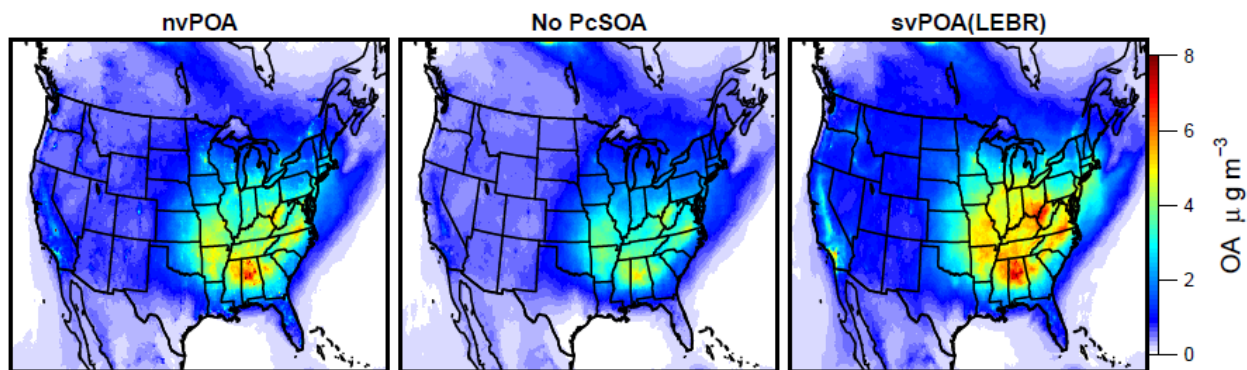

**Figure S6.** Average OA concentrations for nonvolatile POA (nvPOA), semivolatile POA with no pcSOA (No PcSOA), and semivolatile POA with pcSOA (svPOA(LEBR)). This simulation is for July, 2011.

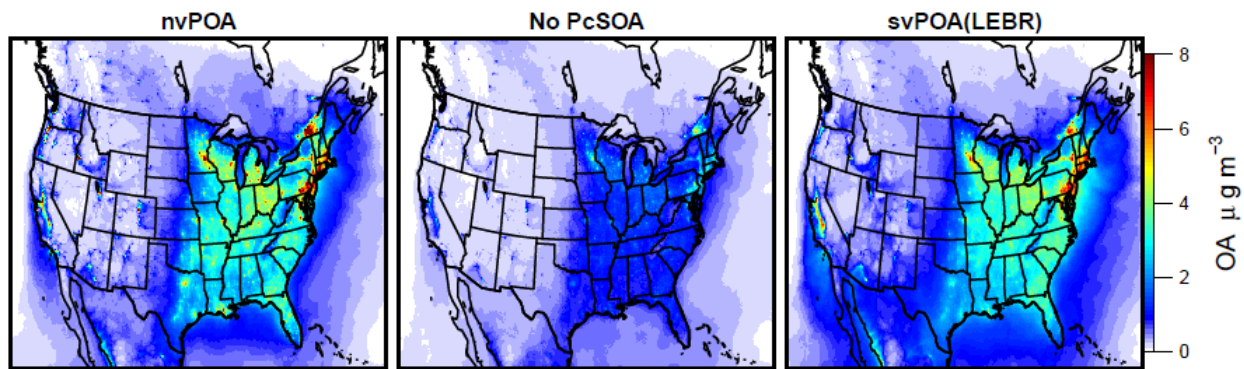

**Figure S7.** Average OA concentrations for nonvolatile POA (nvPOA), semivolatile POA with no pcSOA (No PcSOA), and semivolatile POA with pcSOA (svPOA(LEBR)). This simulation is for January, 2011.
